# Supplementary material for: Subnational estimates of life expectancy at birth in India: evidence from NFHS and SRS data
Source: Springer Nature journal article supplement (doi:10.1186/s12889-024-18278-3), 2024-04-16
Supplement: MOESM1 [file 26985422]

**Supplementary table:** District level life expectancy at birth ( $e_0$ ) in India from NFHS-4 (2015-16) and NFHS-5 (2019-21).

| Area name (State/District)         | NFHS-4 (2015-16) |      |        | NFHS-5 (2019-21) |      |        |
|------------------------------------|------------------|------|--------|------------------|------|--------|
|                                    | Person           | Male | Female | Person           | Male | Female |
| <b>India</b>                       | 69.3             | 68.6 | 70.1   | 73.2             | 71.9 | 74.5   |
| <b>ANDAMAN AND NICOBAR ISLANDS</b> | 69.6             | 71.7 | 67.3   | 67.1             | 62.1 | 84.3   |
| Nicobar                            | 69.3             | 71.3 | 67.6   | 67.1             | 62.1 | 84.3   |
| North & Middle Andaman             | 69.6             | 69.4 | 69.8   | 67.1             | 62.1 | 84.3   |
| South Andaman                      | 69.7             | 72.7 | 66.2   | 67.1             | 62.1 | 84.3   |
| <b>ANDHRA PRADESH</b>              | 64.5             | 61.9 | 67.4   | 64.8             | 62.2 | 67.7   |
| Srikakulam                         | 54.7             | 56.9 | 52.4   | 70.3             | 68.1 | 72.3   |
| Vizianagaram                       | 65.9             | 69.5 | 61.9   | 68.3             | 62.2 | 81.8   |
| Visakhapatnam                      | 62.3             | 61.9 | 75.3   | 60.3             | 62.2 | 65.9   |
| East Godavari                      | 58.1             | 59.6 | 56.8   | 66.9             | 64.8 | 69.7   |
| West Godavari                      | 68.7             | 68.0 | 69.8   | 75.7             | 76.4 | 74.8   |
| Krishna                            | 72.6             | 80.1 | 64.4   | 65.1             | 62.2 | 81.8   |
| Guntur                             | 61.4             | 55.6 | 70.7   | 64.1             | 70.4 | 67.7   |
| Prakasam                           | 64.5             | 61.9 | 58.5   | 57.4             | 62.2 | 74.5   |
| Sri Potti Sriramulu Nellore Y.s.r. | 67.4             | 60.1 | 74.0   | 62.0             | 61.3 | 62.8   |
| Kurnool                            | 60.8             | 54.0 | 71.3   | 64.8             | 62.2 | 67.7   |
| Anantapur                          | 67.3             | 64.6 | 70.7   | 60.3             | 63.6 | 67.7   |
| Chittoor                           | 68.5             | 61.9 | 74.3   | 70.3             | 69.8 | 71.5   |
| <b>ARUNACHAL PRADESH</b>           | 77.4             | 81.2 | 74.3   | 69.8             | 68.2 | 71.4   |
| Tawang                             | 81.3             | 81.2 | 81.4   | 74.2             | 73.7 | 74.7   |
| West Kameng                        | 88.2             | 87.8 | 88.4   | 76.3             | 76.3 | 76.3   |
| East Kameng                        | 88.2             | 83.0 | 93.6   | 72.3             | 75.0 | 68.7   |
| Papum Pare                         | 76.3             | 75.4 | 77.2   | 71.7             | 72.1 | 71.3   |
| Upper Subansiri                    | 80.4             | 82.4 | 78.1   | 76.3             | 76.3 | 76.3   |
| West Siang                         | 90.5             | 91.8 | 89.0   | 75.4             | 75.3 | 75.4   |
| East Siang                         | 91.2             | 89.1 | 93.6   | 75.3             | 74.3 | 76.3   |
| Upper Siang                        | 91.9             | 90.3 | 93.6   | 74.6             | 72.7 | 76.3   |
| Changlang                          | 93.6             | 93.6 | 93.6   | 72.6             | 70.8 | 74.4   |
| Tirap                              | 81.6             | 87.1 | 76.4   | 74.6             | 72.9 | 76.3   |
| Lower Subansiri                    | 78.5             | 74.5 | 82.9   | 75.5             | 74.8 | 76.3   |
| Kurung Kumey                       | 88.2             | 82.9 | 93.6   | 74.7             | 72.4 | 76.3   |
| Dibang Valley                      | 84.5             | 83.6 | 85.3   | 72.1             | 70.1 | 74.6   |
| Lower Dibang Valley                | 89.7             | 90.3 | 89.3   | 72.0             | 71.9 | 72.1   |
| Lohit                              | 79.7             | 76.2 | 84.4   | 75.7             | 75.3 | 76.3   |
| Anjaw                              | 66.1             | 68.0 | 63.8   | 71.8             | 71.7 | 71.9   |
| Kra Daadi                          | 77.6             | 75.5 | 79.4   | 75.0             | 73.8 | 76.3   |
| Longding                           | NA               | NA   | NA     | 75.1             | 74.1 | 76.3   |
| Namsai                             | NA               | NA   | NA     | 73.5             | 75.2 | 71.8   |
| Siang                              | NA               | NA   | NA     | 71.9             | 72.0 | 71.6   |
|                                    | NA               | NA   | NA     | 74.9             | 74.9 | 74.9   |

| Area name (State/District) | NFHS-4 (2015-16) |      |        | NFHS-5 (2019-21) |      |        |
|----------------------------|------------------|------|--------|------------------|------|--------|
|                            | Person           | Male | Female | Person           | Male | Female |
| <b>ASSAM</b>               | 65.9             | 64.7 | 67.2   | 71.6             | 68.9 | 74.5   |
| Kokrajhar                  | 66.5             | 65.3 | 68.0   | 67.7             | 62.9 | 72.9   |
| Dhubri                     | 72.2             | 70.2 | 74.6   | 74.5             | 71.0 | 78.5   |
| Goalpara                   | 70.0             | 70.7 | 69.2   | 73.0             | 74.9 | 71.2   |
| Barpeta                    | 68.3             | 68.8 | 67.8   | 74.7             | 74.4 | 75.0   |
| Marigaon                   | 65.9             | 64.7 | 56.0   | 64.8             | 68.0 | 61.8   |
| Nagaon                     | 60.1             | 62.7 | 57.4   | 67.6             | 63.7 | 71.6   |
| Sonitpur                   | 66.5             | 63.1 | 70.1   | 71.2             | 62.5 | 78.5   |
| Lakhimpur                  | 68.3             | 63.9 | 72.8   | 81.2             | 79.8 | 82.8   |
| Dhemaji                    | 64.8             | 61.9 | 68.2   | 75.0             | 76.2 | 73.8   |
| Tinsukia                   | 67.2             | 64.8 | 70.0   | 67.9             | 65.5 | 70.6   |
| Dibrugarh                  | 77.8             | 76.0 | 79.8   | 75.9             | 68.9 | 83.3   |
| Sivasagar                  | 60.9             | 58.5 | 63.4   | 74.8             | 68.4 | 81.8   |
| Jorhat                     | 71.0             | 65.2 | 79.3   | 65.8             | 67.0 | 64.5   |
| Golaghat                   | 61.8             | 58.0 | 65.8   | 74.3             | 67.9 | 80.0   |
| Karbi Anglong              | 60.6             | 55.2 | 67.4   | 76.6             | 80.4 | 72.1   |
| Dima Hasao                 | 67.7             | 65.0 | 70.6   | 77.4             | 73.4 | 82.1   |
| Cachar                     | 58.5             | 60.7 | 56.1   | 72.9             | 67.5 | 78.5   |
| Karimganj                  | 57.0             | 57.9 | 56.1   | 66.0             | 65.1 | 66.8   |
| Hailakandi                 | 64.1             | 63.9 | 64.3   | 71.6             | 68.9 | 74.5   |
| Bongaigaon                 | 75.8             | 73.9 | 77.9   | 79.1             | 78.2 | 80.0   |
| Chirang                    | 70.9             | 70.0 | 71.8   | 70.9             | 70.9 | 70.8   |
| Kamrup                     | 76.3             | 72.9 | 80.0   | 79.0             | 80.2 | 77.3   |
| Kamrup Metropolitan        | 69.9             | 71.4 | 68.0   | 77.3             | 69.8 | 85.9   |
| Nalbari                    | 63.4             | 62.5 | 64.5   | 80.9             | 76.2 | 85.9   |
| Baksa                      | 69.5             | 68.5 | 70.6   | 74.5             | 68.0 | 80.7   |
| Darrang                    | 68.1             | 63.2 | 73.2   | 74.1             | 75.7 | 72.3   |
| Udalguri                   | 65.6             | 66.0 | 65.1   | 71.1             | 66.8 | 74.5   |
| Biswanath                  | NA               | NA   | NA     | 65.6             | 59.0 | 72.4   |
| Charaideo                  | NA               | NA   | NA     | 65.8             | 60.0 | 71.9   |
| Hojai                      | NA               | NA   | NA     | 75.6             | 72.2 | 79.1   |
| Majuli                     | NA               | NA   | NA     | 69.0             | 75.1 | 61.7   |
| South Salmara Mancachar    | NA               | NA   | NA     | 73.9             | 71.6 | 76.4   |
| West Karbi Anglong         | NA               | NA   | NA     | 74.8             | 70.9 | 78.4   |
| <b>BIHAR</b>               | 66.9             | 66.5 | 67.3   | 69.3             | 68.5 | 70.3   |
| Pashchim Champaran         | 66.2             | 64.8 | 67.8   | 64.4             | 68.5 | 77.2   |
| Purba Champaran            | 66.6             | 67.0 | 66.1   | 68.0             | 72.1 | 63.4   |
| Sheohar                    | 65.6             | 64.5 | 67.0   | 66.0             | 68.1 | 64.1   |
| Sitamarhi                  | 66.3             | 65.4 | 67.2   | 65.0             | 67.6 | 62.5   |
| Madhubani                  | 67.4             | 68.2 | 66.6   | 70.2             | 73.5 | 66.3   |
| Supaul                     | 67.9             | 68.0 | 67.9   | 70.8             | 70.6 | 70.9   |
| Araria                     | 65.9             | 64.3 | 67.5   | 66.5             | 66.9 | 66.1   |

| Area name (State/District) | NFHS-4 (2015-16) |      |        | NFHS-5 (2019-21) |      |        |
|----------------------------|------------------|------|--------|------------------|------|--------|
|                            | Person           | Male | Female | Person           | Male | Female |
| Kishanganj                 | 67.4             | 66.7 | 68.2   | 70.9             | 66.3 | 75.9   |
| Purnia                     | 64.4             | 65.6 | 63.2   | 65.6             | 65.2 | 66.0   |
| Katihar                    | 66.0             | 63.7 | 68.8   | 73.2             | 70.2 | 76.8   |
| Madhepura                  | 67.5             | 66.7 | 68.5   | 68.0             | 65.0 | 70.8   |
| Saharsa                    | 65.1             | 64.9 | 65.4   | 64.3             | 67.6 | 61.3   |
| Darbhanga                  | 68.2             | 68.3 | 68.2   | 74.1             | 77.9 | 69.7   |
| Muzaffarpur                | 67.6             | 68.2 | 67.0   | 73.7             | 76.0 | 70.4   |
| Gopalganj                  | 67.8             | 66.7 | 69.0   | 76.6             | 74.6 | 78.8   |
| Siwan                      | 67.0             | 66.4 | 67.7   | 62.0             | 68.5 | 72.2   |
| Saran (chhapra)            | 67.3             | 65.7 | 69.0   | 68.4             | 67.4 | 69.6   |
| Vaishali                   | 66.7             | 66.3 | 67.2   | 65.4             | 58.6 | 72.0   |
| Samastipur                 | 68.0             | 68.2 | 67.7   | 71.7             | 72.2 | 71.1   |
| Begusarai                  | 67.3             | 67.0 | 67.6   | 66.7             | 66.2 | 67.2   |
| Khagaria                   | 66.7             | 65.6 | 67.8   | 70.8             | 74.0 | 67.6   |
| Bhagalpur                  | 67.9             | 66.8 | 69.3   | 71.6             | 70.7 | 72.5   |
| Banka                      | 67.0             | 67.9 | 65.9   | 70.7             | 67.2 | 74.5   |
| Munger                     | 67.0             | 67.4 | 66.6   | 73.9             | 70.5 | 77.5   |
| Lakhisarai                 | 66.6             | 66.8 | 66.5   | 73.4             | 71.2 | 75.9   |
| Sheikhpura                 | 66.9             | 67.5 | 66.3   | 65.3             | 62.9 | 68.1   |
| Nalanda                    | 67.0             | 67.5 | 66.5   | 71.1             | 70.8 | 71.3   |
| Patna                      | 68.0             | 66.9 | 69.0   | 72.4             | 66.3 | 78.5   |
| Bhojpur                    | 67.6             | 67.5 | 67.7   | 73.8             | 76.1 | 71.1   |
| Buxar                      | 66.1             | 64.7 | 67.5   | 66.4             | 67.0 | 65.7   |
| Kaimur (bhabua)            | 66.8             | 66.3 | 67.4   | 67.5             | 63.5 | 72.1   |
| Rohtas                     | 66.4             | 64.8 | 68.2   | 57.4             | 68.5 | 64.4   |
| Aurangabad                 | 67.0             | 67.5 | 66.6   | 73.6             | 70.8 | 76.9   |
| Gaya                       | 65.1             | 64.3 | 66.0   | 74.8             | 72.1 | 78.0   |
| Nawada                     | 68.0             | 68.5 | 67.5   | 77.3             | 77.6 | 77.0   |
| Jamui                      | 66.6             | 66.0 | 67.3   | 66.2             | 65.9 | 66.4   |
| Jehanabad                  | 65.3             | 65.2 | 65.5   | 68.7             | 69.9 | 67.5   |
| Arwal                      | 67.4             | 67.8 | 67.0   | 65.7             | 66.6 | 64.6   |
| <b>CHANDIGARH</b>          | 77.2             | 78.2 | 76.2   | 65.9             | 61.9 | 70.7   |
| <b>CHHATTISGARH</b>        | 64.7             | 64.1 | 65.3   | 70.2             | 69.6 | 70.9   |
| Koriya                     | 63.7             | 62.3 | 65.2   | 70.2             | 69.6 | 70.9   |
| Surguja                    | 62.7             | 64.3 | 61.0   | 62.3             | 67.3 | 58.2   |
| Jashpur                    | 63.3             | 60.7 | 66.4   | 72.0             | 75.8 | 68.1   |
| Raigarh                    | 65.2             | 66.4 | 63.9   | 64.5             | 80.2 | 70.9   |
| Korba                      | 62.1             | 62.2 | 62.0   | 70.2             | 69.6 | 66.2   |
| Janjgir-champa             | 68.4             | 73.0 | 63.3   | 73.8             | 80.8 | 65.5   |
| Bilaspur                   | 66.0             | 66.5 | 65.5   | 65.7             | 68.9 | 62.7   |
| Kabeerdham                 | 66.9             | 66.1 | 67.7   | 84.6             | 85.6 | 83.5   |
| Rajnandgaon                | 65.6             | 61.4 | 69.9   | 74.2             | 72.2 | 76.1   |

| Area name (State/District)    | NFHS-4 (2015-16) |      |        | NFHS-5 (2019-21) |      |        |
|-------------------------------|------------------|------|--------|------------------|------|--------|
|                               | Person           | Male | Female | Person           | Male | Female |
| Durg                          | 66.8             | 65.4 | 68.5   | 84.8             | 82.0 | 70.9   |
| Raipur                        | 63.4             | 61.3 | 65.5   | 79.2             | 71.0 | 87.8   |
| Mahasamund                    | 66.3             | 64.6 | 68.4   | 80.3             | 68.8 | 70.9   |
| Dhamtari                      | 65.6             | 68.9 | 62.8   | 70.2             | 69.6 | 70.9   |
| Uttar Bastar Kanker           | 61.5             | 62.7 | 60.1   | 70.2             | 69.6 | 70.9   |
| Bastar                        | 64.2             | 62.9 | 65.5   | 70.2             | 69.6 | 63.9   |
| Narayanpur                    | 66.2             | 64.7 | 68.0   | 73.5             | 65.2 | 81.2   |
| Dakshin Bastar Dantewada      | 58.5             | 54.7 | 62.4   | NA               | NA   | NA     |
| Bijapur                       | 64.9             | 62.9 | 67.3   | 60.5             | 60.2 | 60.8   |
| Balod                         | NA               | NA   | NA     | 84.7             | 82.2 | 87.2   |
| Baloda Bazar                  | NA               | NA   | NA     | 60.2             | 69.6 | 62.7   |
| Balrampur                     | NA               | NA   | NA     | 70.2             | 59.9 | 70.9   |
| Bemetara                      | NA               | NA   | NA     | 84.9             | 79.3 | 70.9   |
| Dantewada                     | NA               | NA   | NA     | 74.2             | 70.5 | 77.0   |
| Gariyaband                    | NA               | NA   | NA     | 77.8             | 69.0 | 86.7   |
| Kodagaon                      | NA               | NA   | NA     | 62.0             | 69.6 | 75.4   |
| Mungeli                       | NA               | NA   | NA     | 60.3             | 69.6 | 77.9   |
| Sukma                         | NA               | NA   | NA     | 65.2             | 67.1 | 63.2   |
| Surajpur                      | NA               | NA   | NA     | 69.8             | 70.8 | 68.5   |
| <b>DADRA AND NAGAR HAVELI</b> | 73.0             | 73.4 | 72.7   | 70.6             | 67.7 | 76.9   |
| <b>DAMAN AND DIU</b>          | 65.5             | 62.6 | 68.6   | 70.6             | 67.7 | 76.9   |
| Diu                           | 77.6             | 75.1 | 80.8   | 70.6             | 67.7 | 76.9   |
| Daman                         | 62.2             | 58.8 | 65.7   | 70.6             | 67.7 | 76.9   |
| <b>GOA</b>                    | 74.6             | 73.7 | 75.5   | 78.7             | 79.0 | 78.3   |
| North Goa                     | 74.5             | 73.4 | 75.8   | 78.8             | 80.0 | 77.3   |
| South Goa                     | 74.6             | 74.2 | 75.0   | 78.6             | 77.5 | 80.0   |
| <b>GUJARAT</b>                | 68.0             | 65.7 | 70.5   | 74.3             | 74.0 | 74.7   |
| Kachchh                       | 65.8             | 63.8 | 67.8   | 75.4             | 71.1 | 80.2   |
| Banas Kantha                  | 54.6             | 65.7 | 62.9   | 70.7             | 67.2 | 74.3   |
| Patan                         | 62.9             | 65.7 | 78.4   | 74.3             | 74.0 | 64.1   |
| Mahesana                      | 69.3             | 68.2 | 70.5   | 74.3             | 59.7 | 74.7   |
| Sabar Kantha                  | 77.3             | 73.8 | 81.3   | 71.9             | 68.6 | 75.8   |
| Gandhinagar                   | 67.3             | 63.2 | 71.2   | 63.7             | 71.2 | 74.7   |
| Ahmadabad                     | 72.8             | 65.0 | 82.5   | 75.8             | 78.6 | 72.9   |
| Surendranagar                 | 72.7             | 72.6 | 72.7   | 77.2             | 67.3 | 87.7   |
| Rajkot                        | 70.3             | 73.2 | 66.6   | 81.6             | 80.3 | 82.9   |
| Jamnagar                      | 66.0             | 62.5 | 69.3   | 85.5             | 74.0 | 87.9   |
| Porbandar                     | 74.2             | 77.0 | 70.9   | 80.6             | 78.6 | 82.6   |
| Junagadh                      | 69.3             | 67.8 | 70.7   | 79.0             | 75.4 | 83.1   |
| Amreli                        | 81.2             | 81.3 | 81.1   | 79.6             | 84.3 | 75.2   |
| Bhavnagar                     | 70.3             | 66.9 | 73.9   | 76.0             | 69.2 | 82.7   |
| Anand                         | 68.0             | 65.7 | 56.8   | 61.1             | 72.1 | 74.7   |

| Area name (State/District) | NFHS-4 (2015-16) |      |        | NFHS-5 (2019-21) |      |        |
|----------------------------|------------------|------|--------|------------------|------|--------|
|                            | Person           | Male | Female | Person           | Male | Female |
| Kheda                      | 68.0             | 53.0 | 52.5   | 61.9             | 74.0 | 72.9   |
| Panch Mahals               | 70.7             | 78.9 | 62.1   | 66.7             | 76.4 | 74.7   |
| Dohad                      | 68.0             | 65.7 | 56.0   | 76.4             | 79.4 | 73.5   |
| Vadodara                   | 65.5             | 61.6 | 68.9   | 81.7             | 75.8 | 86.5   |
| Narmada                    | 65.2             | 67.8 | 62.1   | 72.6             | 74.0 | 74.7   |
| Bharuch                    | 62.9             | 54.7 | 71.2   | 67.8             | 63.8 | 71.6   |
| The Dangs                  | 66.4             | 70.5 | 62.5   | 74.3             | 85.4 | 74.7   |
| Navsari                    | 74.3             | 69.8 | 79.8   | 74.3             | 83.8 | 74.7   |
| Valsad                     | 67.7             | 60.3 | 74.4   | 85.3             | 83.1 | 87.6   |
| Surat                      | 80.8             | 82.3 | 78.7   | 82.2             | 85.5 | 78.3   |
| Tapi                       | 78.2             | 79.2 | 77.1   | 75.4             | 70.8 | 79.8   |
| Aravali                    | NA               | NA   | NA     | 71.8             | 75.0 | 68.2   |
| Botad                      | NA               | NA   | NA     | 85.1             | 87.9 | 82.2   |
| Chhota Udaipur             | NA               | NA   | NA     | 61.1             | 74.0 | 77.3   |
| Devbhumi Dwarka            | NA               | NA   | NA     | 79.5             | 74.0 | 69.7   |
| Gir Somnath                | NA               | NA   | NA     | 84.7             | 74.0 | 81.8   |
| Mahisagar                  | NA               | NA   | NA     | 72.9             | 83.3 | 62.8   |
| Morbi                      | NA               | NA   | NA     | 74.3             | 74.0 | 79.2   |
| <b>HARYANA</b>             | 70.6             | 70.9 | 70.2   | 75.8             | 73.2 | 78.7   |
| Panchkula                  | 74.6             | 75.4 | 73.6   | 75.1             | 80.7 | 73.8   |
| Ambala                     | 73.4             | 73.9 | 72.8   | 56.9             | 73.1 | 78.7   |
| Yamunanagar                | 73.2             | 74.1 | 71.8   | 85.1             | 82.3 | 78.7   |
| Kurukshetra                | 75.5             | 74.9 | 76.2   | 82.1             | 73.7 | 79.6   |
| Kaithal                    | 68.2             | 69.5 | 66.8   | 65.5             | 73.2 | 66.9   |
| Karnal                     | 73.1             | 73.9 | 72.2   | 85.4             | 73.2 | 78.7   |
| Panipat                    | 73.5             | 73.6 | 73.4   | 70.2             | 68.9 | 61.5   |
| Sonipat                    | 75.5             | 76.2 | 74.7   | 78.4             | 73.2 | 75.3   |
| Jind                       | 71.6             | 74.3 | 69.1   | 69.5             | 67.1 | 66.9   |
| Fatehabad                  | 72.1             | 72.0 | 72.2   | 65.8             | 65.8 | 77.6   |
| Sirsa                      | 69.1             | 67.7 | 70.8   | 75.8             | 66.6 | 78.7   |
| Hisar                      | 68.6             | 68.4 | 68.8   | 83.9             | 73.2 | 73.9   |
| Bhiwani                    | 67.2             | 65.5 | 69.0   | 66.5             | 73.2 | 59.6   |
| Rohtak                     | 67.9             | 66.8 | 69.1   | 86.1             | 67.0 | 78.7   |
| Jhajjar                    | 71.3             | 70.1 | 73.0   | 75.8             | 73.2 | 78.7   |
| Mahendragarh               | 72.2             | 73.0 | 71.2   | 80.6             | 69.4 | 73.5   |
| Rewari                     | 69.7             | 69.3 | 70.2   | 80.0             | 64.0 | 78.7   |
| Gurgaon                    | 73.3             | 74.5 | 71.9   | 77.6             | 82.6 | 78.7   |
| Mewat                      | 66.0             | 66.1 | 65.8   | 65.4             | 60.2 | 66.2   |
| Faridabad                  | 69.7             | 70.6 | 68.5   | 79.7             | 73.2 | 78.7   |
| Palwal                     | 69.1             | 70.4 | 67.6   | 85.5             | 73.2 | 78.7   |
| Charkhi Dadri              | NA               | NA   | NA     | 78.4             | 73.2 | 82.8   |
| <b>HIMACHAL PRADESH</b>    | 71.1             | 69.4 | 73.0   | 74.2             | 73.9 | 74.5   |

| Area name (State/District) | NFHS-4 (2015-16) |      |        | NFHS-5 (2019-21) |      |        |
|----------------------------|------------------|------|--------|------------------|------|--------|
|                            | Person           | Male | Female | Person           | Male | Female |
| Chamba                     | 59.0             | 53.2 | 65.7   | 74.9             | 73.7 | 75.7   |
| Kangra                     | 71.0             | 65.8 | 77.9   | 73.4             | 72.6 | 74.3   |
| Lahul & Spiti              | 73.6             | 71.7 | 76.3   | 75.5             | 68.7 | 76.3   |
| Kullu                      | 74.5             | 76.9 | 72.1   | 74.9             | 73.3 | 75.0   |
| Mandi                      | 73.7             | 78.6 | 68.9   | 74.8             | 68.3 | 74.0   |
| Hamirpur                   | 71.0             | 73.5 | 68.4   | 75.0             | 73.6 | 75.7   |
| Una                        | 72.4             | 71.4 | 73.6   | 74.0             | 74.2 | 74.1   |
| Bilaspur                   | 78.5             | 78.6 | 78.3   | 75.2             | 72.0 | 73.3   |
| Solan                      | 72.1             | 72.6 | 71.7   | 71.1             | 73.1 | 74.0   |
| Sirmaur                    | 67.6             | 67.3 | 68.2   | 75.5             | 73.6 | 74.7   |
| Shimla                     | 73.0             | 64.6 | 81.0   | 74.9             | 73.9 | 74.5   |
| Kinnaur                    | 68.0             | 66.3 | 70.1   | 73.5             | 72.8 | 72.3   |
| <b>JAMMU AND KASHMIR</b>   | 72.5             | 72.2 | 72.8   | 75.0             | 75.0 | 75.0   |
| Kupwara                    | 72.6             | 71.9 | 73.3   | 74.9             | 74.9 | 74.9   |
| Badgam                     | 72.7             | 73.5 | 71.8   | 75.0             | 74.9 | 75.0   |
| Leh (ladakh)               | 73.0             | 74.8 | 71.1   | NA               | NA   | NA     |
| Kargil                     | 71.5             | 69.9 | 73.6   | NA               | NA   | NA     |
| Punch                      | 73.1             | 73.0 | 73.1   | 74.9             | 74.6 | 74.9   |
| Rajouri                    | 72.6             | 72.8 | 72.5   | 75.0             | 74.8 | 75.0   |
| Kathua                     | 72.1             | 72.9 | 71.3   | 74.9             | 74.8 | 75.0   |
| Baramula                   | 71.9             | 70.4 | 73.5   | 75.0             | 75.0 | 75.0   |
| Bandipore                  | 71.1             | 70.6 | 71.6   | 75.0             | 74.9 | 75.0   |
| Srinagar                   | 72.1             | 70.8 | 73.3   | 75.0             | 74.9 | 74.9   |
| Ganderbal                  | 70.9             | 68.9 | 72.7   | 75.0             | 74.9 | 75.0   |
| Pulwama                    | 71.9             | 71.0 | 73.0   | 75.0             | 75.0 | 75.0   |
| Shupiyani                  | 73.2             | 74.2 | 72.4   | 75.0             | 74.9 | 75.0   |
| Anantnag                   | 70.8             | 70.6 | 71.0   | 75.0             | 74.6 | 75.0   |
| Kulgam                     | 70.3             | 68.3 | 72.3   | 75.0             | 74.9 | 75.0   |
| Doda                       | 71.9             | 72.3 | 71.4   | 75.0             | 75.0 | 75.0   |
| Ramban                     | 72.2             | 72.5 | 71.8   | 75.0             | 75.0 | 75.0   |
| Kishtwar                   | 71.6             | 70.5 | 72.9   | 75.0             | 74.9 | 75.0   |
| Udhampur                   | 72.9             | 74.3 | 71.5   | 75.0             | 74.8 | 75.0   |
| Reasi                      | 73.5             | 72.7 | 74.4   | 75.0             | 74.9 | 75.0   |
| Jammu                      | 74.9             | 75.0 | 74.8   | 75.0             | 75.0 | 75.0   |
| Samba                      | 74.7             | 73.8 | 75.6   | 75.0             | 74.9 | 75.0   |
| <b>JHARKHAND</b>           | 70.0             | 70.1 | 69.9   | 68.4             | 66.9 | 70.1   |
| Garhwa                     | 70.9             | 70.5 | 71.3   | 66.7             | 71.5 | 61.1   |
| Chatra                     | 70.7             | 71.6 | 69.7   | 63.6             | 62.3 | 65.3   |
| Kodarma                    | 69.0             | 69.9 | 68.0   | 71.1             | 76.5 | 65.3   |
| Giridih                    | 69.9             | 69.9 | 69.9   | 65.3             | 66.9 | 78.0   |
| Deoghar                    | 70.1             | 69.9 | 70.4   | 66.7             | 69.4 | 63.8   |
| Godda                      | 70.6             | 71.5 | 69.6   | 60.5             | 63.5 | 57.2   |

| Area name (State/District) | NFHS-4 (2015-16) |             |             | NFHS-5 (2019-21) |             |             |
|----------------------------|------------------|-------------|-------------|------------------|-------------|-------------|
|                            | Person           | Male        | Female      | Person           | Male        | Female      |
| Sahibganj                  | 70.7             | 70.6        | 70.8        | 74.9             | 74.9        | 74.9        |
| Pakur                      | 69.8             | 70.6        | 68.9        | 68.3             | 63.9        | 73.4        |
| Dhanbad                    | 70.2             | 70.8        | 69.4        | 70.3             | 66.5        | 75.0        |
| Bokaro                     | 69.7             | 69.6        | 69.6        | 73.4             | 74.1        | 72.7        |
| Lohardaga                  | 68.2             | 68.9        | 67.5        | 73.7             | 73.1        | 74.2        |
| Purbi Singhbhum            | 67.8             | 67.5        | 68.3        | 67.0             | 61.4        | 74.0        |
| Palamu                     | 70.3             | 70.5        | 70.0        | 67.2             | 66.4        | 67.9        |
| Latehar                    | 69.4             | 69.4        | 69.5        | 68.1             | 61.8        | 75.1        |
| Hazaribagh                 | 70.0             | 69.8        | 70.2        | 71.0             | 70.0        | 72.4        |
| Ramgarh                    | 69.4             | 70.0        | 68.7        | 73.3             | 73.4        | 73.2        |
| Dumka                      | 71.7             | 71.4        | 71.9        | 67.1             | 64.0        | 70.5        |
| Jamtara                    | 69.8             | 70.1        | 69.6        | 71.2             | 77.5        | 63.9        |
| Ranchi                     | 69.8             | 69.8        | 69.7        | 69.5             | 69.3        | 69.7        |
| Khunti                     | 68.6             | 67.9        | 69.2        | 74.6             | 72.1        | 78.1        |
| Gumla                      | 68.9             | 68.9        | 68.9        | 65.8             | 62.1        | 69.6        |
| Simdega                    | 70.5             | 70.3        | 70.6        | 69.6             | 66.6        | 72.9        |
| Pashchimi Singhbhum        | 71.4             | 71.2        | 71.6        | 69.8             | 70.6        | 68.9        |
| Saraikela-kharsawan        | 69.7             | 69.9        | 69.4        | 62.1             | 66.9        | 70.3        |
| <b>KARNATAKA</b>           | <b>74.4</b>      | <b>73.5</b> | <b>75.3</b> | <b>75.9</b>      | <b>73.8</b> | <b>78.2</b> |
| Belgaum                    | 76.0             | 74.4        | 77.7        | 77.7             | 75.0        | 80.8        |
| Bagalkot                   | 73.0             | 71.4        | 75.0        | 77.9             | 77.9        | 77.9        |
| Bijapur                    | 73.6             | 73.4        | 73.9        | 75.4             | 69.5        | 82.5        |
| Bidar                      | 72.0             | 66.3        | 77.7        | 73.0             | 71.5        | 74.7        |
| Raichur                    | 70.0             | 65.9        | 74.0        | 66.0             | 64.3        | 67.7        |
| Koppal                     | 72.9             | 72.0        | 73.8        | 71.5             | 76.8        | 66.0        |
| Gadag                      | 74.8             | 73.0        | 77.0        | 72.9             | 76.0        | 69.6        |
| Dharwad                    | 70.2             | 72.9        | 67.3        | 75.1             | 77.9        | 72.7        |
| Uttara Kannada             | 74.0             | 75.5        | 72.2        | 75.0             | 76.4        | 73.0        |
| Haveri                     | 78.8             | 78.4        | 79.3        | 71.0             | 74.6        | 66.6        |
| Bellary                    | 74.5             | 76.9        | 72.0        | 64.4             | 73.8        | 71.5        |
| Chitradurga                | 67.3             | 63.5        | 71.6        | 73.6             | 71.5        | 75.7        |
| Davanagere                 | 72.1             | 66.3        | 78.0        | 76.1             | 75.3        | 77.1        |
| Shimoga                    | 71.9             | 71.2        | 72.9        | 77.5             | 69.8        | 85.2        |
| Udupi                      | 76.1             | 74.6        | 78.0        | 83.0             | 80.6        | 85.1        |
| Chikmagalur                | 79.6             | 77.1        | 81.3        | 77.7             | 77.6        | 77.8        |
| Tumkur                     | 62.1             | 62.8        | 61.4        | 69.7             | 63.4        | 75.4        |
| Bangalore                  | 77.4             | 77.6        | 77.2        | 78.3             | 73.8        | 82.3        |
| Mandya                     | 75.5             | 77.2        | 73.5        | 84.3             | 85.6        | 83.2        |
| Hassan                     | 77.0             | 77.9        | 76.2        | 83.3             | 88.6        | 77.2        |
| Dakshina Kannada           | 78.8             | 78.6        | 79.0        | 86.4             | 88.6        | 84.3        |
| Kodagu                     | 77.3             | 72.5        | 81.3        | 77.3             | 70.7        | 83.1        |
| Mysore                     | 74.9             | 75.6        | 73.9        | 80.5             | 71.7        | 78.2        |

| Area name (State/District) | NFHS-4 (2015-16) |             |             | NFHS-5 (2019-21) |             |             |
|----------------------------|------------------|-------------|-------------|------------------|-------------|-------------|
|                            | Person           | Male        | Female      | Person           | Male        | Female      |
| Chamrajnagar               | 70.6             | 70.6        | 70.5        | 73.7             | 71.7        | 76.1        |
| Gulbarga                   | 76.4             | 73.2        | 80.1        | 78.9             | 77.4        | 80.4        |
| Yadgir                     | 75.5             | 75.1        | 76.1        | 73.4             | 70.0        | 77.2        |
| Kolar                      | 69.9             | 70.2        | 69.5        | 84.2             | 86.6        | 81.8        |
| Chikkaballapura            | 77.7             | 76.9        | 78.7        | 81.0             | 78.7        | 82.9        |
| Bangalore Rural            | 74.0             | 67.8        | 79.3        | 76.4             | 75.9        | 76.8        |
| Ramanagara                 | 78.9             | 79.0        | 78.8        | 65.3             | 58.4        | 73.9        |
| <b>KERALA</b>              | <b>86.8</b>      | <b>86.7</b> | <b>86.9</b> | <b>79.9</b>      | <b>80.1</b> | <b>79.7</b> |
| Kasaragod                  | 88.1             | 85.8        | 90.6        | 79.7             | 80.6        | 78.7        |
| Kannur                     | 88.0             | 85.3        | 90.6        | 80.6             | 80.6        | 80.6        |
| Wayanad                    | 80.3             | 84.5        | 76.8        | 79.1             | 77.5        | 80.6        |
| Kozhikode                  | 82.0             | 81.6        | 82.4        | 79.8             | 80.6        | 79.0        |
| Malappuram                 | 88.4             | 86.3        | 90.6        | 79.7             | 79.8        | 79.6        |
| Palakkad                   | 90.6             | 90.6        | 90.6        | 79.9             | 80.6        | 79.2        |
| Thrissur                   | 90.6             | 90.6        | 90.6        | 79.7             | 80.6        | 78.5        |
| Ernakulam                  | 90.6             | 90.6        | 90.6        | 79.5             | 80.6        | 78.4        |
| Idukki                     | 90.6             | 90.6        | 90.6        | 78.7             | 77.1        | 80.6        |
| Kottayam                   | 86.4             | 90.6        | 82.7        | 80.6             | 80.6        | 80.6        |
| Alappuzha                  | 74.8             | 90.6        | 62.1        | 79.4             | 77.6        | 80.6        |
| Pathanamthitta             | 90.6             | 90.6        | 90.6        | 79.0             | 80.6        | 77.3        |
| Kollam                     | 85.1             | 86.9        | 83.0        | 80.1             | 79.5        | 80.6        |
| Thiruvananthapuram         | 84.0             | 77.0        | 90.6        | 80.6             | 80.6        | 80.6        |
| <b>LAKSHADWEEP</b>         | <b>70.5</b>      | <b>71.0</b> | <b>70.0</b> | <b>78.2</b>      | <b>78.2</b> | <b>78.2</b> |
| <b>MADHYA PRADESH</b>      | <b>65.6</b>      | <b>63.8</b> | <b>67.6</b> | <b>68.1</b>      | <b>66.7</b> | <b>69.6</b> |
| Sheopur                    | 67.7             | 64.5        | 71.2        | 64.2             | 61.7        | 66.7        |
| Morena                     | 64.9             | 65.0        | 64.6        | 67.6             | 65.7        | 69.3        |
| Bhind                      | 66.4             | 68.7        | 63.9        | 68.6             | 70.0        | 67.2        |
| Gwalior                    | 57.5             | 54.0        | 61.7        | 72.0             | 72.3        | 71.6        |
| Datia                      | 59.9             | 57.3        | 63.3        | 61.4             | 66.7        | 70.4        |
| Shivpuri                   | 63.6             | 60.6        | 66.5        | 71.4             | 71.1        | 71.7        |
| Tikamgarh                  | 66.2             | 72.4        | 59.4        | 68.8             | 61.4        | 76.2        |
| Chhatarpur                 | 61.2             | 62.7        | 59.4        | 65.3             | 68.0        | 62.4        |
| Panna                      | 58.2             | 59.5        | 56.6        | 57.0             | 58.1        | 69.6        |
| Sagar                      | 63.0             | 52.3        | 77.0        | 64.6             | 63.2        | 66.1        |
| Damoh                      | 65.7             | 68.6        | 62.6        | 63.1             | 68.9        | 69.6        |
| Satna                      | 67.3             | 70.3        | 64.3        | 63.7             | 65.5        | 61.4        |
| Rewa                       | 53.7             | 63.8        | 58.1        | 57.9             | 66.7        | 60.2        |
| Umaria                     | 65.5             | 58.3        | 72.7        | 57.1             | 66.7        | 66.9        |
| Neemuch                    | 74.1             | 71.5        | 77.2        | 71.4             | 71.3        | 71.7        |
| Mandsaur                   | 64.0             | 61.5        | 67.0        | 69.7             | 69.7        | 69.7        |
| Ratlam                     | 73.4             | 73.9        | 72.7        | 68.0             | 66.0        | 69.8        |
| Ujjain                     | 72.1             | 64.7        | 79.7        | 72.4             | 74.4        | 70.3        |



| Area name (State/District) | NFHS-4 (2015-16) |      |        | NFHS-5 (2019-21) |      |        |
|----------------------------|------------------|------|--------|------------------|------|--------|
|                            | Person           | Male | Female | Person           | Male | Female |
| Shajapur                   | 69.4             | 65.9 | 73.3   | 64.4             | 63.1 | 65.6   |
| Dewas                      | 59.7             | 61.5 | 57.9   | 70.3             | 63.6 | 78.3   |
| Dhar                       | 62.6             | 53.9 | 72.1   | 74.6             | 74.4 | 74.8   |
| Indore                     | 80.2             | 80.8 | 79.6   | 74.9             | 75.8 | 74.0   |
| West Nimar                 | 68.3             | 66.5 | 70.1   | 71.6             | 67.0 | 76.4   |
| Barwani                    | 69.2             | 69.5 | 68.9   | 76.8             | 73.0 | 81.2   |
| Rajgarh                    | 62.4             | 55.2 | 70.4   | 65.7             | 63.7 | 67.8   |
| Vidisha                    | 58.3             | 53.8 | 63.0   | 69.0             | 68.2 | 69.8   |
| Bhopal                     | 67.7             | 72.6 | 62.7   | 76.5             | 73.2 | 79.2   |
| Sehore                     | 69.0             | 66.8 | 71.2   | 60.5             | 63.1 | 57.5   |
| Raisen                     | 68.4             | 63.8 | 73.8   | 73.0             | 76.5 | 68.4   |
| Betul                      | 72.3             | 73.3 | 71.3   | 70.2             | 66.8 | 73.6   |
| Harda                      | 74.0             | 72.2 | 76.3   | 69.3             | 63.9 | 76.2   |
| Hoshangabad                | 71.5             | 69.4 | 73.8   | 71.8             | 66.2 | 78.0   |
| Katni                      | 55.7             | 63.8 | 62.5   | 68.1             | 66.7 | 69.6   |
| Jabalpur                   | 65.5             | 66.1 | 64.8   | 82.6             | 82.6 | 82.6   |
| Narsimhapur                | 68.0             | 57.3 | 81.3   | 67.0             | 63.4 | 70.8   |
| Dindori                    | 61.6             | 57.8 | 66.4   | 65.3             | 64.7 | 66.0   |
| Mandla                     | 63.8             | 57.1 | 71.4   | 68.0             | 64.2 | 71.7   |
| Chhindwara                 | 55.6             | 55.6 | 55.5   | 74.3             | 75.2 | 73.4   |
| Seoni                      | 67.3             | 77.9 | 57.2   | 70.0             | 65.3 | 74.0   |
| Balaghat                   | 61.7             | 64.4 | 59.0   | 72.8             | 74.2 | 71.3   |
| Guna                       | 65.5             | 62.9 | 68.0   | 65.0             | 60.8 | 70.3   |
| Ashoknagar                 | 72.8             | 73.4 | 72.1   | 64.3             | 64.0 | 64.6   |
| Shahdol                    | 62.6             | 69.1 | 56.0   | 58.1             | 66.7 | 59.1   |
| Anuppur                    | 68.3             | 71.3 | 64.7   | 60.0             | 66.7 | 63.6   |
| Sidhi                      | 65.6             | 62.9 | 68.7   | 65.0             | 67.3 | 62.0   |
| Singrauli                  | 64.9             | 58.9 | 71.3   | 70.7             | 65.3 | 77.2   |
| Jhabua                     | 68.5             | 61.9 | 75.3   | 69.0             | 65.6 | 72.1   |
| Alirajpur                  | 66.5             | 61.5 | 72.0   | 76.4             | 76.7 | 76.0   |
| East Nimar                 | 71.8             | 72.4 | 71.0   | NA               | NA   | NA     |
| Burhanpur                  | 66.3             | 59.2 | 75.0   | 67.7             | 63.7 | 72.5   |
| Khandwa (East Nimar)       | NA               | NA   | NA     | 74.4             | 69.5 | 78.5   |
| Agar Malwa                 | NA               | NA   | NA     | 74.2             | 75.1 | 73.6   |
| <b>MAHARASHTRA</b>         | 72.9             | 71.0 | 75.0   | 74.6             | 74.3 | 74.9   |
| Nandurbar                  | 70.7             | 66.6 | 74.8   | 70.9             | 71.6 | 70.1   |
| Dhule                      | 77.6             | 82.2 | 72.1   | 73.5             | 76.3 | 70.6   |
| Jalgaon                    | 68.0             | 66.0 | 70.1   | 76.0             | 79.1 | 72.3   |
| Buldana                    | 75.9             | 71.0 | 81.5   | 73.5             | 73.0 | 74.0   |
| Akola                      | 70.9             | 64.8 | 77.8   | 70.1             | 69.6 | 70.4   |
| Washim                     | 74.5             | 73.4 | 75.5   | 72.1             | 66.9 | 77.8   |
| Amravati                   | 76.6             | 76.0 | 77.0   | 76.8             | 79.1 | 74.6   |

| Area name (State/District) | NFHS-4 (2015-16) |      |        | NFHS-5 (2019-21) |      |        |
|----------------------------|------------------|------|--------|------------------|------|--------|
|                            | Person           | Male | Female | Person           | Male | Female |
| Wardha                     | 70.7             | 56.8 | 82.4   | 73.7             | 71.2 | 76.1   |
| Nagpur                     | 75.2             | 78.3 | 72.0   | 77.1             | 78.2 | 75.8   |
| Bhandara                   | 61.4             | 50.7 | 71.7   | 72.2             | 70.5 | 74.0   |
| Gondiya                    | 75.8             | 77.2 | 74.3   | 71.7             | 68.8 | 74.6   |
| Garhchiroli                | 74.0             | 65.6 | 81.8   | 75.2             | 74.0 | 76.2   |
| Chandrapur                 | 74.6             | 70.4 | 79.1   | 73.0             | 72.8 | 73.1   |
| Yavatmal                   | 74.1             | 71.8 | 76.8   | 70.3             | 74.4 | 66.4   |
| Nanded                     | 66.5             | 62.5 | 70.7   | 74.6             | 73.9 | 75.4   |
| Hingoli                    | 60.9             | 60.0 | 61.9   | 71.9             | 71.5 | 72.4   |
| Parbhani                   | 71.3             | 65.9 | 76.8   | 76.2             | 77.3 | 75.1   |
| Jalna                      | 71.0             | 68.3 | 74.1   | 71.7             | 71.6 | 71.8   |
| Aurangabad                 | 71.5             | 73.3 | 70.1   | 75.3             | 75.3 | 75.1   |
| Nashik                     | 76.6             | 69.8 | 85.3   | 71.0             | 76.6 | 65.0   |
| Thane                      | 74.6             | 75.6 | 73.5   | 78.0             | 75.3 | 80.5   |
| Mumbai Suburban            | 66.1             | 61.5 | 71.2   | 63.0             | 59.6 | 68.0   |
| Mumbai                     | 73.9             | 80.2 | 68.4   | 76.1             | 74.6 | 77.5   |
| Raigarh                    | 63.7             | 69.1 | 57.2   | 75.6             | 73.2 | 78.4   |
| Pune                       | 75.5             | 75.8 | 75.2   | 79.8             | 79.1 | 80.5   |
| Ahmadnagar                 | 80.5             | 82.4 | 78.3   | 74.0             | 75.1 | 72.7   |
| Bid                        | 70.9             | 66.2 | 75.6   | 77.3             | 78.9 | 75.5   |
| Latur                      | 76.9             | 74.6 | 79.4   | 76.0             | 75.8 | 76.1   |
| Osmanabad                  | 73.1             | 71.3 | 75.3   | 77.6             | 74.7 | 80.5   |
| Solapur                    | 74.8             | 69.1 | 82.4   | 75.5             | 72.3 | 79.1   |
| Satara                     | 73.7             | 70.9 | 76.6   | 78.4             | 78.4 | 78.3   |
| Ratnagiri                  | 75.5             | 69.5 | 81.8   | 73.7             | 73.0 | 74.3   |
| Sindhudurg                 | 71.6             | 72.7 | 70.3   | 77.8             | 75.5 | 80.5   |
| Kolhapur                   | 76.9             | 71.8 | 85.3   | 74.3             | 71.3 | 77.7   |
| Sangli                     | 74.1             | 74.8 | 73.5   | 75.7             | 74.7 | 76.8   |
| Palghar                    | NA               | NA   | NA     | 77.7             | 80.5 | 74.1   |
| <b>MANIPUR</b>             | 70.7             | 68.6 | 73.0   | 74.0             | 71.4 | 76.7   |
| Senapati                   | 61.4             | 64.0 | 58.3   | 83.0             | 82.6 | 83.5   |
| Tamenglong                 | 68.0             | 58.5 | 76.4   | 71.0             | 62.9 | 80.1   |
| Churachandpur              | 60.9             | 68.6 | 72.8   | 75.0             | 60.3 | 76.7   |
| Bishnupur                  | 74.8             | 72.0 | 78.1   | 78.9             | 77.3 | 80.6   |
| Thoubal                    | 68.5             | 74.1 | 63.1   | 68.8             | 74.1 | 63.2   |
| Imphal West                | 80.9             | 77.0 | 84.7   | 82.6             | 72.8 | 76.7   |
| Imphal East                | 71.4             | 67.4 | 76.2   | 68.7             | 69.3 | 68.1   |
| Ukhrul                     | 68.2             | 68.9 | 67.5   | 76.7             | 80.9 | 72.4   |
| Chandel                    | 69.5             | 72.5 | 66.4   | 63.0             | 71.4 | 72.3   |
| <b>MEGHALAYA</b>           | 75.7             | 74.2 | 77.2   | 74.4             | 72.9 | 76.0   |
| West Garo Hills            | 73.3             | 69.6 | 77.1   | 83.4             | 83.4 | 83.4   |
| East Garo Hills            | 82.4             | 81.6 | 83.1   | 82.5             | 81.2 | 83.4   |

| Area name (State/District) | NFHS-4 (2015-16) |      |        | NFHS-5 (2019-21) |      |        |
|----------------------------|------------------|------|--------|------------------|------|--------|
|                            | Person           | Male | Female | Person           | Male | Female |
| South Garo Hills           | 77.1             | 76.1 | 78.0   | 82.7             | 83.4 | 82.0   |
| West Khasi Hills           | 73.7             | 71.5 | 76.0   | 69.0             | 67.0 | 71.2   |
| Ri Bhoi                    | 69.7             | 63.9 | 75.1   | 74.2             | 72.3 | 76.5   |
| East Khasi Hills           | 78.2             | 76.9 | 79.7   | 74.3             | 73.7 | 75.0   |
| Jaintia Hills              | 73.1             | 75.7 | 70.7   | NA               | NA   | NA     |
| East Jantia Hills          | NA               | NA   | NA     | 71.1             | 68.3 | 73.9   |
| North Garo Hills           | NA               | NA   | NA     | 80.1             | 79.4 | 80.8   |
| South West Garo Hills      | NA               | NA   | NA     | 79.5             | 80.3 | 78.7   |
| South West Khasi Hills     | NA               | NA   | NA     | 67.6             | 65.3 | 70.0   |
| West Jaintia Hills         | NA               | NA   | NA     | 74.0             | 71.9 | 76.2   |
| <b>MIZORAM</b>             | 65.1             | 60.2 | 70.2   | 74.9             | 74.8 | 74.9   |
| Mamit                      | 65.1             | 60.2 | 64.0   | 73.8             | 73.7 | 73.9   |
| Kolasib                    | 71.1             | 76.0 | 65.9   | 73.5             | 73.3 | 73.7   |
| Aizawl                     | 61.9             | 60.2 | 76.2   | 75.6             | 75.6 | 75.6   |
| Champhai                   | 65.8             | 68.1 | 63.7   | 72.9             | 72.4 | 73.4   |
| Serchhip                   | 59.6             | 58.8 | 60.6   | 75.0             | 75.2 | 74.8   |
| Lunglei                    | 71.7             | 68.5 | 75.2   | 73.5             | 73.5 | 73.4   |
| Lawangtlai                 | 67.4             | 76.7 | 58.5   | 76.6             | 77.8 | 75.3   |
| Saiha                      | 87.6             | 96.0 | 78.3   | 75.5             | 73.3 | 77.3   |
| <b>NAGALAND</b>            | 82.9             | 82.8 | 82.9   | 84.1             | 82.5 | 85.9   |
| Mon                        | 92.7             | 91.3 | 94.3   | 84.1             | 86.4 | 85.9   |
| Mokokchung                 | 79.1             | 72.8 | 85.6   | 83.3             | 82.5 | 77.8   |
| Zunheboto                  | 90.3             | 89.8 | 91.0   | 84.1             | 76.5 | 85.9   |
| Wokha                      | 84.7             | 84.8 | 84.6   | 78.5             | 70.5 | 85.8   |
| Dimapur                    | 80.9             | 79.9 | 81.9   | 84.1             | 84.8 | 85.9   |
| Phek                       | 83.2             | 85.8 | 80.6   | 81.4             | 75.8 | 85.9   |
| Tuensang                   | 80.4             | 86.3 | 74.5   | 84.1             | 85.8 | 85.9   |
| Longleng                   | 88.5             | 88.6 | 88.6   | 79.7             | 79.5 | 80.1   |
| Kiphire                    | 65.1             | 63.8 | 66.5   | 80.7             | 75.9 | 86.3   |
| Kohima                     | 79.6             | 80.4 | 78.9   | 84.1             | 82.5 | 83.9   |
| Peren                      | 77.8             | 67.3 | 90.6   | 73.8             | 73.1 | 74.4   |
| <b>DELHI</b>               | 69.2             | 66.8 | 73.1   | 72.4             | 72.6 | 72.3   |
| North West                 | 67.8             | 93.6 | 73.1   | 72.4             | 73.0 | 71.8   |
| North                      | 67.8             | 93.6 | 73.1   | 71.9             | 72.5 | 71.4   |
| North East                 | 67.8             | 93.6 | 73.1   | 72.6             | 73.3 | 71.8   |
| East                       | 67.8             | 93.6 | 73.1   | 72.5             | 72.3 | 72.8   |
| New Delhi                  | 67.8             | 93.6 | 73.1   | 73.0             | 72.7 | 73.3   |
| Central                    | 67.8             | 93.6 | 73.1   | 73.2             | 73.2 | 73.2   |
| West                       | 67.8             | 93.6 | 73.1   | 72.3             | 72.6 | 72.0   |
| South West                 | 67.8             | 93.6 | 73.1   | 72.6             | 72.7 | 72.6   |
| South                      | 67.8             | 93.6 | 73.1   | 71.9             | 70.3 | 73.5   |
| Shahdara                   | NA               | NA   | NA     | 72.0             | 72.4 | 71.6   |

| Area name (State/District) | NFHS-4 (2015-16) |      |        | NFHS-5 (2019-21) |      |        |
|----------------------------|------------------|------|--------|------------------|------|--------|
|                            | Person           | Male | Female | Person           | Male | Female |
| South East                 | NA               | NA   | NA     | 72.3             | 72.1 | 72.5   |
| <b>ODISHA</b>              | 67.9             | 67.8 | 68.0   | 69.5             | 68.5 | 70.6   |
| Bargarh                    | 68.2             | 69.3 | 66.9   | 75.5             | 75.5 | 75.4   |
| Jharsuguda                 | 67.5             | 66.7 | 68.4   | 71.3             | 66.5 | 77.8   |
| Sambalpur                  | 69.1             | 70.1 | 68.2   | 71.8             | 70.0 | 73.6   |
| Debagarh                   | 66.6             | 65.3 | 67.7   | 65.7             | 64.5 | 67.1   |
| Sundargarh                 | 70.9             | 70.8 | 71.0   | 61.3             | 63.2 | 58.9   |
| Kendujhar                  | 66.7             | 69.1 | 64.1   | 67.9             | 67.2 | 68.7   |
| Mayurbhanj                 | 69.5             | 67.8 | 71.4   | 68.9             | 67.4 | 70.7   |
| Baleshwar                  | 71.1             | 74.2 | 68.0   | 73.3             | 72.6 | 74.0   |
| Bhadrak                    | 68.9             | 68.6 | 69.2   | 72.0             | 70.4 | 73.6   |
| Kendrapara                 | 69.5             | 68.1 | 70.8   | 67.9             | 68.0 | 67.9   |
| Jagatsinghapur             | 67.5             | 65.8 | 69.4   | 73.8             | 72.6 | 75.2   |
| Cuttack                    | 71.0             | 69.2 | 72.8   | 74.1             | 75.9 | 71.8   |
| Jajapur                    | 67.9             | 71.1 | 63.8   | 69.4             | 67.5 | 71.6   |
| Dhenkanal                  | 67.2             | 65.3 | 69.1   | 71.3             | 67.5 | 75.9   |
| Anugul                     | 64.3             | 67.8 | 60.8   | 70.7             | 69.4 | 72.1   |
| Nayagarh                   | 66.8             | 67.9 | 65.5   | 74.1             | 74.3 | 73.9   |
| Khordha                    | 73.1             | 74.1 | 72.0   | 72.1             | 72.8 | 71.2   |
| Puri                       | 67.4             | 66.2 | 68.7   | 73.0             | 69.4 | 77.8   |
| Ganjam                     | 68.4             | 65.2 | 72.5   | 73.2             | 72.3 | 74.4   |
| Gajapati                   | 67.3             | 67.1 | 67.6   | 65.3             | 64.5 | 66.0   |
| Kandhamal                  | 63.3             | 61.7 | 64.9   | 70.0             | 67.5 | 72.6   |
| Bauda                      | 64.3             | 63.5 | 65.1   | 68.8             | 71.8 | 65.4   |
| Subarnapur                 | 68.1             | 66.3 | 69.8   | 67.6             | 65.8 | 69.6   |
| Balangir                   | 67.8             | 66.3 | 69.2   | 69.0             | 70.0 | 67.9   |
| Nuapada                    | 69.0             | 70.9 | 67.1   | 69.0             | 68.8 | 69.2   |
| Kalahandi                  | 66.0             | 65.0 | 67.1   | 68.0             | 66.6 | 69.6   |
| Rayagada                   | 59.5             | 60.9 | 58.0   | 68.2             | 67.5 | 69.0   |
| Nabarangapur               | 64.5             | 64.4 | 64.6   | 63.0             | 68.5 | 69.4   |
| Koraput                    | 68.6             | 68.6 | 68.7   | 64.8             | 63.1 | 66.5   |
| Malkangiri                 | 61.6             | 61.1 | 62.1   | 69.5             | 68.5 | 70.6   |
| <b>PUDUCHERRY</b>          | 72.7             | 70.7 | 75.1   | 78.2             | 78.2 | 78.2   |
| Yanam                      | 70.0             | 65.2 | 74.7   | 67.3             | 67.2 | 67.5   |
| Puducherry                 | 72.6             | 70.2 | 75.6   | 66.0             | 66.0 | 66.0   |
| Mahe                       | 80.1             | 77.3 | 82.5   | 66.0             | 66.0 | 66.0   |
| Karaikal                   | 72.7             | 72.8 | 72.6   | 66.3             | 66.2 | 66.3   |
| <b>PUNJAB</b>              | 72.7             | 73.8 | 71.4   | 75.1             | 74.6 | 75.7   |
| Gurdaspur                  | 73.7             | 77.2 | 69.9   | 76.2             | 62.5 | 78.2   |
| Kapurthala                 | 73.0             | 73.1 | 72.9   | 77.5             | 67.0 | 75.9   |
| Jalandhar                  | 71.2             | 73.1 | 69.0   | 73.2             | 73.1 | 72.7   |
| Hoshiarpur                 | 73.2             | 74.8 | 71.3   | 80.0             | 79.0 | 78.6   |

| Area name (State/District) | NFHS-4 (2015-16) |      |        | NFHS-5 (2019-21) |      |        |
|----------------------------|------------------|------|--------|------------------|------|--------|
|                            | Person           | Male | Female | Person           | Male | Female |
| Sangrur                    | 70.7             | 65.7 | 75.6   | 67.8             | 77.2 | 67.7   |
| Fatehgarh Sahib            | 70.9             | 80.0 | 61.0   | 74.6             | 79.3 | 69.9   |
| Ludhiana                   | 72.8             | 75.9 | 69.0   | 78.7             | 77.2 | 80.0   |
| Moga                       | 69.1             | 73.0 | 65.5   | 73.7             | 72.0 | 78.6   |
| Firozpur                   | 70.9             | 67.7 | 74.2   | 76.8             | 76.5 | 79.6   |
| Muktsar                    | 68.0             | 65.4 | 71.5   | 68.7             | 68.4 | 67.2   |
| Faridkot                   | 76.3             | 73.5 | 79.2   | 71.3             | 69.9 | 74.4   |
| Bathinda                   | 72.1             | 74.6 | 69.4   | 77.6             | 70.8 | 78.2   |
| Mansa                      | 73.7             | 74.0 | 73.3   | 70.1             | 74.1 | 70.7   |
| Patiala                    | 73.0             | 73.6 | 72.4   | 76.5             | 72.4 | 72.7   |
| Amritsar                   | 74.8             | 78.0 | 71.0   | 79.4             | 72.9 | 79.3   |
| Tarn Taran                 | 70.1             | 70.4 | 69.6   | 72.0             | 81.6 | 73.3   |
| Rupnagar                   | 73.4             | 75.4 | 71.0   | 74.8             | 75.5 | 79.3   |
| Sahibzada Ajit Singh Nagar | 73.0             | 72.5 | 73.7   | 70.5             | 78.5 | 81.5   |
| Shahid Bhagat Singh Nagar  | 79.6             | 78.1 | 81.8   | 81.6             | 76.0 | 81.5   |
| Barnala                    | 65.4             | 64.1 | 66.6   | 68.9             | 82.4 | 68.2   |
| Fazilka                    | NA               | NA   | NA     | 75.8             | 80.2 | 73.9   |
| Pathankot                  | NA               | NA   | NA     | 73.6             | 73.9 | 71.3   |
| <b>RAJASTHAN</b>           | 71.2             | 70.9 | 71.5   | 70.9             | 65.7 | 76.8   |
| Ganganagar                 | 71.8             | 72.9 | 70.7   | 64.4             | 62.9 | 66.0   |
| Hanumangarh                | 73.6             | 70.3 | 76.9   | 84.6             | 75.8 | 76.8   |
| Bikaner                    | 72.0             | 73.7 | 70.3   | 80.7             | 79.8 | 81.5   |
| Churu                      | 74.8             | 74.4 | 75.3   | 70.9             | 65.7 | 76.8   |
| Jhunjhunun                 | 70.3             | 69.4 | 71.3   | 70.9             | 65.7 | 80.0   |
| Alwar                      | 73.1             | 71.8 | 74.8   | 81.4             | 87.7 | 75.7   |
| Bharatpur                  | 72.9             | 71.4 | 74.5   | 72.2             | 65.7 | 76.8   |
| Dhaulpur                   | 70.8             | 70.2 | 71.5   | 70.9             | 65.7 | 59.3   |
| Karauli                    | 65.7             | 67.4 | 63.9   | 75.4             | 69.6 | 82.3   |
| Sawai Madhopur             | 67.5             | 66.8 | 68.3   | 70.9             | 65.7 | 76.8   |
| Dausa                      | 70.0             | 70.0 | 69.9   | 70.9             | 63.0 | 76.8   |
| Jaipur                     | 71.3             | 72.9 | 69.5   | 61.4             | 65.7 | 87.9   |
| Sikar                      | 73.3             | 73.5 | 73.1   | 75.2             | 74.8 | 75.5   |
| Nagaur                     | 75.0             | 75.2 | 74.8   | 70.4             | 65.7 | 86.0   |
| Jodhpur                    | 68.9             | 70.1 | 67.5   | 70.9             | 78.4 | 76.8   |
| Jaisalmer                  | 67.6             | 69.1 | 65.9   | 79.3             | 59.1 | 76.8   |
| Barmer                     | 69.2             | 71.9 | 66.2   | 70.9             | 65.7 | 76.8   |
| Jalor                      | 66.8             | 63.1 | 71.5   | 70.9             | 65.7 | 76.8   |
| Sirohi                     | 65.0             | 64.8 | 65.1   | 74.9             | 65.7 | 76.8   |
| Pali                       | 71.6             | 66.1 | 78.3   | 70.9             | 65.7 | 76.8   |
| Ajmer                      | 75.4             | 75.5 | 75.2   | 70.9             | 65.7 | 76.8   |
| Tonk                       | 72.7             | 75.7 | 69.6   | 70.9             | 65.7 | 76.8   |
| Bundi                      | 70.9             | 74.7 | 67.2   | 70.9             | 65.7 | 76.8   |

| Area name (State/District) | NFHS-4 (2015-16) |      |        | NFHS-5 (2019-21) |      |        |
|----------------------------|------------------|------|--------|------------------|------|--------|
|                            | Person           | Male | Female | Person           | Male | Female |
| Bhilwara                   | 68.0             | 65.4 | 70.9   | 70.9             | 65.7 | 76.8   |
| Rajsamand                  | 67.5             | 65.0 | 70.8   | 59.9             | 65.7 | 76.8   |
| Dungarpur                  | 73.6             | 73.5 | 73.6   | 70.9             | 65.7 | 76.8   |
| Banswara                   | 73.4             | 70.1 | 76.9   | 64.5             | 65.7 | 76.8   |
| Chittaurgarh               | 67.5             | 64.5 | 70.7   | 70.9             | 65.7 | 76.8   |
| Kota                       | 75.6             | 79.9 | 70.8   | 67.5             | 79.3 | 76.8   |
| Baran                      | 73.2             | 75.3 | 70.7   | 70.9             | 65.7 | 76.8   |
| Jhalawar                   | 68.4             | 63.4 | 75.3   | 70.9             | 65.7 | 76.8   |
| Udaipur                    | 70.9             | 68.9 | 73.0   | 70.9             | 65.7 | 76.8   |
| Pratapgarh                 | 71.6             | 71.0 | 72.3   | 70.9             | 65.7 | 76.8   |
| <b>SIKKIM</b>              | 71.5             | 70.9 | 72.2   | 83.0             | 82.8 | 83.2   |
| North District             | 74.0             | 74.1 | 73.9   | 73.3             | 73.1 | 73.4   |
| West District              | 59.6             | 57.8 | 62.0   | 82.6             | 83.4 | 81.5   |
| South District             | 75.8             | 73.4 | 78.1   | 81.6             | 75.6 | 86.3   |
| East District              | 74.3             | 74.9 | 73.5   | 84.8             | 86.3 | 83.2   |
| <b>TAMIL NADU</b>          | 76.4             | 75.9 | 77.1   | 81.3             | 80.1 | 82.7   |
| Thiruvallur                | 75.6             | 80.4 | 70.4   | 85.6             | 79.0 | 82.7   |
| Chennai                    | 84.7             | 84.9 | 84.6   | 81.3             | 81.2 | 82.7   |
| Kancheepuram               | 79.5             | 84.9 | 74.5   | 81.7             | 78.7 | 85.2   |
| Vellore                    | 75.9             | 73.2 | 78.4   | 78.5             | 79.9 | 76.7   |
| Tiruvannamalai             | 76.7             | 75.9 | 77.7   | 69.6             | 71.8 | 67.6   |
| Viluppuram                 | 78.1             | 77.4 | 79.0   | 70.4             | 80.1 | 87.0   |
| Salem                      | 78.3             | 72.8 | 84.9   | 82.7             | 78.5 | 87.0   |
| Namakkal                   | 83.6             | 84.9 | 82.0   | 77.7             | 77.1 | 78.1   |
| Erode                      | 81.2             | 80.4 | 82.1   | 81.3             | 80.1 | 82.7   |
| The Nilgiris               | 83.7             | 82.6 | 84.9   | 83.1             | 82.9 | 83.2   |
| Dindigul                   | 72.6             | 67.6 | 77.7   | 73.2             | 73.4 | 73.0   |
| Karur                      | 78.7             | 81.8 | 75.7   | 84.2             | 84.1 | 84.7   |
| Tiruchirappalli            | 66.8             | 70.3 | 63.6   | 82.4             | 85.4 | 79.1   |
| Perambalur                 | 74.3             | 65.6 | 84.9   | 76.8             | 85.7 | 67.9   |
| Ariyalur                   | 76.5             | 73.5 | 80.3   | 77.0             | 68.9 | 88.2   |
| Cuddalore                  | 74.0             | 71.3 | 77.6   | 72.6             | 76.2 | 68.3   |
| Nagappattinam              | 78.3             | 81.4 | 75.0   | 81.3             | 80.1 | 79.6   |
| Thiruvarur                 | 71.2             | 71.3 | 71.1   | 83.2             | 74.8 | 82.7   |
| Thanjavur                  | 71.1             | 74.8 | 66.5   | 74.5             | 72.5 | 76.6   |
| Pudukkottai                | 78.1             | 77.8 | 78.4   | 71.4             | 65.0 | 79.5   |
| Sivaganga                  | 75.8             | 83.1 | 69.6   | 80.2             | 79.9 | 80.6   |
| Madurai                    | 73.8             | 73.1 | 74.5   | 81.3             | 80.1 | 82.7   |
| Theni                      | 78.1             | 77.3 | 78.8   | 81.7             | 72.2 | 82.7   |
| Virudunagar                | 74.9             | 76.7 | 73.0   | 81.3             | 80.1 | 82.7   |
| Ramanathapuram             | 81.8             | 80.9 | 83.1   | 83.5             | 88.9 | 76.7   |
| Thoothukkudi               | 82.9             | 80.8 | 84.9   | 84.3             | 87.7 | 79.8   |

| Area name (State/District) | NFHS-4 (2015-16) |      |        | NFHS-5 (2019-21) |      |        |
|----------------------------|------------------|------|--------|------------------|------|--------|
|                            | Person           | Male | Female | Person           | Male | Female |
| Tirunelveli                | 68.5             | 60.1 | 77.0   | 81.1             | 82.3 | 79.9   |
| Kanniyakumari              | 79.6             | 78.5 | 80.6   | 81.3             | 80.1 | 82.7   |
| Dharmapuri                 | 74.2             | 72.2 | 76.4   | 80.6             | 84.3 | 77.1   |
| Krishnagiri                | 69.5             | 68.3 | 71.1   | 75.3             | 73.1 | 78.0   |
| Coimbatore                 | 78.0             | 77.0 | 79.4   | 78.7             | 81.0 | 76.2   |
| Tiruppur                   | 71.4             | 69.8 | 72.9   | 81.3             | 80.1 | 87.4   |
| <b>TRIPURA</b>             | 71.3             | 69.7 | 72.9   | 71.1             | 69.9 | 72.2   |
| West Tripura               | 72.4             | 71.1 | 73.7   | 72.9             | 70.4 | 75.5   |
| South Tripura              | 75.4             | 76.0 | 74.7   | 69.0             | 65.8 | 71.9   |
| Dhalai                     | 71.9             | 69.9 | 74.3   | 73.1             | 74.9 | 71.5   |
| North Tripura              | 65.7             | 62.1 | 69.7   | 69.4             | 70.0 | 68.9   |
| Gomati                     | NA               | NA   | NA     | 70.4             | 71.0 | 69.7   |
| Khowai                     | NA               | NA   | NA     | 68.7             | 62.5 | 76.3   |
| Sepahijala                 | NA               | NA   | NA     | 71.5             | 72.1 | 70.9   |
| Unakoti                    | NA               | NA   | NA     | 71.8             | 70.6 | 72.9   |
| <b>UTTAR PRADESH</b>       | 65.6             | 65.4 | 65.8   | 69.8             | 68.9 | 70.7   |
| Saharanpur                 | 65.2             | 68.8 | 61.6   | 67.6             | 76.2 | 76.8   |
| Muzaffarnagar              | 67.2             | 68.7 | 65.4   | 69.8             | 68.9 | 70.7   |
| Bijnor                     | 66.9             | 68.4 | 65.2   | 71.1             | 68.4 | 74.0   |
| Moradabad                  | 63.4             | 63.3 | 63.6   | 64.2             | 68.9 | 77.2   |
| Rampur                     | 66.6             | 68.3 | 64.6   | 69.8             | 68.9 | 63.3   |
| Jyotiba Phule Nagar        | 65.3             | 68.4 | 62.3   | 67.4             | 75.3 | 70.7   |
| Meerut                     | 66.5             | 66.0 | 67.0   | 65.8             | 86.4 | 70.7   |
| Baghpat                    | 67.2             | 69.4 | 64.4   | 75.3             | 79.1 | 70.6   |
| Ghaziabad                  | 66.4             | 64.2 | 69.0   | 77.0             | 70.7 | 82.5   |
| Gautam Buddha Nagar        | 67.8             | 67.9 | 67.7   | 69.3             | 66.3 | 73.1   |
| Bulandshahr                | 67.6             | 66.1 | 69.3   | 58.4             | 60.7 | 70.7   |
| Aligarh                    | 62.1             | 61.8 | 62.6   | 64.0             | 74.1 | 70.7   |
| Mahamaya Nagar             | 64.1             | 63.3 | 65.0   | 63.9             | 60.5 | 67.3   |
| Mathura                    | 63.5             | 62.5 | 64.5   | 65.8             | 64.7 | 67.0   |
| Agra                       | 65.8             | 66.6 | 65.0   | 59.3             | 66.9 | 70.7   |
| Firozabad                  | 64.8             | 67.3 | 62.1   | 69.8             | 68.9 | 70.7   |
| Mainpuri                   | 62.8             | 62.4 | 63.3   | 69.8             | 68.9 | 70.7   |
| Budaun                     | 63.7             | 63.6 | 63.8   | 61.9             | 68.2 | 70.7   |
| Bareilly                   | 66.2             | 65.7 | 66.7   | 68.6             | 68.9 | 83.4   |
| Pilibhit                   | 67.2             | 66.7 | 67.6   | 80.4             | 81.1 | 79.6   |
| Shahjahanpur               | 61.9             | 58.8 | 65.2   | 69.8             | 68.9 | 70.7   |
| Kheri                      | 64.8             | 69.9 | 59.5   | 69.8             | 64.7 | 70.7   |
| Sitapur                    | 59.2             | 61.1 | 56.8   | 69.8             | 68.9 | 62.2   |
| Hardoi                     | 62.6             | 61.1 | 64.7   | 69.8             | 68.9 | 70.7   |
| Unnao                      | 66.9             | 66.7 | 67.2   | 61.7             | 62.6 | 61.1   |
| Lucknow                    | 68.0             | 70.1 | 65.6   | 69.8             | 68.9 | 85.1   |

| Area name (State/District)   | NFHS-4 (2015-16) |      |        | NFHS-5 (2019-21) |      |        |
|------------------------------|------------------|------|--------|------------------|------|--------|
|                              | Person           | Male | Female | Person           | Male | Female |
| Rae Bareli                   | 65.1             | 66.0 | 64.2   | 80.8             | 83.6 | 77.6   |
| Farrukhabad                  | 59.1             | 58.8 | 59.6   | 60.0             | 68.9 | 80.4   |
| Kannauj                      | 63.2             | 62.8 | 63.6   | 58.5             | 64.1 | 70.7   |
| Etawah                       | 68.6             | 66.8 | 70.8   | 63.3             | 68.5 | 70.7   |
| Auraiya                      | 70.2             | 70.5 | 69.8   | 65.5             | 61.4 | 70.2   |
| Kanpur Dehat                 | 67.1             | 63.6 | 70.7   | 65.6             | 68.9 | 78.9   |
| Kanpur Nagar                 | 70.8             | 69.9 | 71.8   | 75.6             | 83.6 | 66.1   |
| Jalaun                       | 63.6             | 63.4 | 64.0   | 82.1             | 82.7 | 81.2   |
| Jhansi                       | 67.8             | 68.8 | 66.6   | 78.4             | 70.8 | 86.5   |
| Lalitpur                     | 68.0             | 67.8 | 68.3   | 61.7             | 68.9 | 71.6   |
| Hamirpur                     | 67.3             | 67.2 | 67.6   | 72.0             | 59.0 | 87.9   |
| Mahoba                       | 68.3             | 65.7 | 71.2   | 74.4             | 84.3 | 65.4   |
| Banda                        | 67.3             | 65.4 | 69.3   | 63.3             | 68.9 | 69.3   |
| Chitrakoot                   | 64.9             | 64.0 | 66.0   | 75.8             | 78.2 | 73.1   |
| Fatehpur                     | 68.7             | 71.8 | 65.1   | 68.8             | 62.3 | 76.4   |
| Pratapgarh                   | 68.0             | 63.9 | 73.0   | 73.8             | 69.6 | 78.0   |
| Kaushambi                    | 61.2             | 58.1 | 64.5   | 74.0             | 70.7 | 77.6   |
| Allahabad                    | 68.6             | 70.4 | 66.9   | 67.8             | 68.9 | 83.8   |
| Bara Banki                   | 68.3             | 66.7 | 69.9   | 66.2             | 66.2 | 66.3   |
| Faizabad                     | 64.2             | 64.9 | 63.4   | 69.8             | 68.9 | 82.0   |
| Ambedkar Nagar               | 65.9             | 64.4 | 67.9   | 82.9             | 83.4 | 82.3   |
| Sultanpur                    | 62.8             | 63.9 | 61.6   | 77.1             | 86.5 | 68.2   |
| Bahraich                     | 62.9             | 64.1 | 61.6   | 62.0             | 65.8 | 57.3   |
| Shrawasti                    | 62.6             | 63.6 | 61.6   | 76.8             | 82.4 | 71.2   |
| Balrampur                    | 63.7             | 65.3 | 62.0   | 62.2             | 66.3 | 58.1   |
| Gonda                        | 60.3             | 57.9 | 62.7   | 82.1             | 82.0 | 82.3   |
| Siddharth Nagar              | 65.6             | 64.6 | 66.8   | 69.8             | 68.9 | 70.7   |
| Basti                        | 68.5             | 68.6 | 68.4   | 84.2             | 75.5 | 70.7   |
| Sant Kabir Nagar             | 67.9             | 66.9 | 69.1   | 69.8             | 68.9 | 71.9   |
| Maharajganj                  | 65.0             | 62.4 | 68.1   | 85.9             | 86.0 | 85.8   |
| Gorakhpur                    | 67.4             | 65.5 | 69.5   | 78.3             | 77.3 | 79.3   |
| Kushinagar                   | 66.9             | 64.8 | 69.3   | 69.8             | 82.3 | 70.7   |
| Deoria                       | 68.9             | 67.6 | 70.3   | 69.8             | 68.9 | 70.7   |
| Azamgarh                     | 68.5             | 68.7 | 68.2   | 72.9             | 60.9 | 88.4   |
| Mau                          | 66.2             | 63.7 | 69.0   | 68.4             | 65.0 | 72.2   |
| Ballia                       | 68.7             | 69.3 | 68.1   | 69.8             | 68.9 | 70.7   |
| Jaunpur                      | 64.3             | 64.2 | 64.5   | 69.8             | 68.9 | 70.7   |
| Ghazipur                     | 67.1             | 64.2 | 70.1   | 69.8             | 84.4 | 70.7   |
| Chandauli                    | 69.4             | 69.2 | 69.6   | 80.3             | 63.0 | 70.7   |
| Varanasi                     | 68.9             | 70.2 | 67.5   | 69.8             | 68.9 | 70.7   |
| Sant Ravi Das Nagar(bhadohi) | 65.1             | 62.5 | 68.0   | 64.2             | 67.4 | 60.6   |
| Mirzapur                     | 63.2             | 61.3 | 65.2   | 75.5             | 77.6 | 73.0   |



| Area name (State/District) | NFHS-4 (2015-16) |      |        | NFHS-5 (2019-21) |      |        |
|----------------------------|------------------|------|--------|------------------|------|--------|
|                            | Person           | Male | Female | Person           | Male | Female |
| Sonbhadra                  | 69.2             | 67.0 | 71.8   | 75.2             | 86.6 | 64.5   |
| Etah                       | 65.1             | 63.8 | 66.7   | 67.5             | 60.1 | 75.1   |
| Kansiram Nagar             | 60.8             | 59.0 | 62.8   | 69.8             | 68.9 | 64.1   |
| Amethi                     | NA               | NA   | NA     | 69.8             | 68.9 | 70.7   |
| Hapur                      | NA               | NA   | NA     | 62.7             | 68.9 | 70.7   |
| Sambhal                    | NA               | NA   | NA     | 57.4             | 62.0 | 70.7   |
| Shamli                     | NA               | NA   | NA     | 66.8             | 62.3 | 71.5   |
| <b>UTTARAKHAND</b>         | 68.5             | 67.3 | 69.8   | 72.3             | 72.6 | 72.0   |
| Uttarkashi                 | 60.4             | 51.4 | 72.6   | 72.0             | 70.0 | 71.4   |
| Chamoli                    | 64.5             | 60.7 | 68.8   | 73.4             | 71.6 | 70.3   |
| Rudraprayag                | 77.3             | 70.4 | 85.3   | 70.2             | 70.9 | 68.7   |
| Tehri Garhwal              | 72.6             | 67.5 | 78.1   | 69.8             | 70.7 | 69.7   |
| Dehradun                   | 72.1             | 70.4 | 74.2   | 71.3             | 73.2 | 74.1   |
| Garhwal                    | 78.2             | 76.9 | 80.2   | 70.1             | 69.9 | 69.4   |
| Pithoragarh                | 60.3             | 54.1 | 69.3   | 73.0             | 70.2 | 72.5   |
| Bageshwar                  | 74.5             | 80.7 | 68.0   | 70.8             | 72.1 | 70.9   |
| Almora                     | 69.7             | 64.3 | 75.6   | 68.8             | 72.5 | 68.1   |
| Champawat                  | 65.9             | 61.6 | 70.3   | 71.8             | 71.3 | 72.4   |
| Nainital                   | 71.4             | 76.1 | 66.0   | 69.9             | 73.2 | 68.7   |
| Udham Singh Nagar          | 69.1             | 70.5 | 67.6   | 72.0             | 71.6 | 71.6   |
| Hardwar                    | 63.1             | 62.7 | 63.5   | 75.6             | 73.0 | 74.6   |
| <b>WEST BENGAL</b>         | 71.3             | 69.8 | 72.8   | 68.1             | 68.0 | 68.1   |
| Darjiling                  | 73.1             | 73.3 | 72.9   | 68.1             | 68.2 | 68.0   |
| Jalpaiguri                 | 74.7             | 72.5 | 77.2   | 68.0             | 67.8 | 68.0   |
| Koch Bihar                 | 67.5             | 63.9 | 71.0   | 67.8             | 68.0 | 67.6   |
| Uttar Dinajpur             | 69.0             | 64.5 | 74.2   | 68.1             | 68.1 | 68.1   |
| Dakshin Dinajpur           | 67.3             | 68.7 | 65.8   | 68.1             | 68.0 | 68.2   |
| Maldah                     | 70.9             | 68.7 | 73.5   | 68.0             | 67.8 | 68.2   |
| Murshidabad                | 71.3             | 68.7 | 73.8   | 67.9             | 67.9 | 67.9   |
| Birbhum                    | 70.8             | 69.6 | 72.2   | 68.0             | 68.0 | 68.0   |
| Barddhaman                 | 71.4             | 70.9 | 71.6   | NA               | NA   | NA     |
| Nadia                      | 70.9             | 70.8 | 71.1   | 68.1             | 68.0 | 68.1   |
| North 24 Parganas          | 73.0             | 71.0 | 75.7   | 68.2             | 68.2 | 68.2   |
| Hugli                      | 72.8             | 75.7 | 69.7   | 68.1             | 68.1 | 68.2   |
| Bankura                    | 68.8             | 64.6 | 72.6   | 67.9             | 68.0 | 67.8   |
| Puruliya                   | 69.6             | 68.8 | 70.3   | 68.1             | 68.0 | 68.2   |
| Haora                      | 72.4             | 69.2 | 76.0   | 68.3             | 68.3 | 68.3   |
| Kolkata                    | 72.8             | 76.2 | 69.4   | 68.0             | 67.8 | 68.3   |
| South 24 Parganas          | 72.1             | 69.7 | 74.4   | 68.2             | 68.2 | 68.3   |
| Pashchim Medinipur         | 69.8             | 67.1 | 73.0   | 68.1             | 68.0 | 68.2   |
| Purba Medinipur            | 71.6             | 73.4 | 69.8   | 68.2             | 68.3 | 68.2   |
| Paschim Barddhaman         | NA               | NA   | NA     | 67.9             | 67.6 | 68.2   |

| Area name (State/District) | NFHS-4 (2015-16) |      |        | NFHS-5 (2019-21) |      |        |
|----------------------------|------------------|------|--------|------------------|------|--------|
|                            | Person           | Male | Female | Person           | Male | Female |
| Purba Barddhaman           | NA               | NA   | NA     | 68.0             | 68.0 | 68.0   |
| <b>TELANGANA</b>           | 68.3             | 68.4 | 68.1   | 69.0             | 69.2 | 68.7   |
| Adilabad                   | 65.0             | 67.6 | 61.9   | 68.3             | 68.5 | 68.1   |
| Nizamabad                  | 58.6             | 60.4 | 56.3   | 71.4             | 70.4 | 72.6   |
| Karimnagar                 | 63.0             | 63.4 | 62.6   | 69.5             | 66.6 | 72.5   |
| Medak                      | 60.2             | 63.5 | 57.1   | 66.0             | 71.9 | 59.6   |
| Hyderabad                  | 77.1             | 76.5 | 77.9   | 72.2             | 73.7 | 70.4   |
| Rangareddy                 | 71.8             | 69.9 | 74.1   | 65.4             | 65.9 | 64.9   |
| Mahbubnagar                | 61.7             | 59.8 | 63.7   | 69.6             | 71.8 | 66.8   |
| Nalgonda                   | 72.4             | 73.0 | 71.8   | 71.7             | 73.1 | 70.1   |
| Warangal                   | 70.0             | 71.0 | 69.4   | NA               | NA   | NA     |
| Khammam                    | 69.3             | 69.4 | 69.3   | 70.2             | 68.5 | 72.2   |
| Bhadradi Kothagudem        | NA               | NA   | NA     | 65.3             | 67.1 | 63.3   |
| Jagitial                   | NA               | NA   | NA     | 66.4             | 68.9 | 63.8   |
| Jangoan                    | NA               | NA   | NA     | 70.1             | 67.0 | 73.2   |
| Jayashankar Bhupalapally   | NA               | NA   | NA     | 66.5             | 67.9 | 65.1   |
| Jogulamba Gadwal           | NA               | NA   | NA     | 68.4             | 66.4 | 70.8   |
| Kamareddy                  | NA               | NA   | NA     | 66.6             | 68.1 | 64.8   |
| Komaram Bheem Asifabad     | NA               | NA   | NA     | 65.3             | 64.6 | 66.0   |
| Mahabubabad                | NA               | NA   | NA     | 72.3             | 72.1 | 72.6   |
| Mancherial                 | NA               | NA   | NA     | 73.9             | 72.7 | 75.2   |
| Medchal-Malkajgiri         | NA               | NA   | NA     | 68.2             | 66.4 | 70.6   |
| Nagarkurnool               | NA               | NA   | NA     | 70.1             | 67.9 | 73.0   |
| Nirmal                     | NA               | NA   | NA     | 69.6             | 66.1 | 72.6   |
| Peddapalli                 | NA               | NA   | NA     | 69.2             | 69.5 | 69.0   |
| Rajanna Sircilla           | NA               | NA   | NA     | 66.9             | 66.0 | 67.7   |
| Sangareddy                 | NA               | NA   | NA     | 68.4             | 67.7 | 69.1   |
| Siddipet                   | NA               | NA   | NA     | 66.1             | 68.6 | 63.4   |
| Suryapet                   | NA               | NA   | NA     | 71.3             | 67.9 | 75.2   |
| Vikarabad                  | NA               | NA   | NA     | 61.8             | 58.7 | 65.9   |
| Wanaparthy                 | NA               | NA   | NA     | 65.9             | 65.1 | 66.7   |
| Warangal Rural             | NA               | NA   | NA     | 74.1             | 75.2 | 72.6   |
| Warangal Urban             | NA               | NA   | NA     | 70.2             | 73.3 | 66.5   |
| Yadadri Bhuvanagiri        | NA               | NA   | NA     | 69.8             | 70.3 | 69.4   |

**Note:** "NA" shows the district whose data are not available in NFHS-4 (2015-16) and were newly added in NFHS-5 (2019-21)
